# Supplementary material for: Direct eight-electron NO3−-to-NH3 conversion: using a Co-doped TiO2 nanoribbon array as a high-efficiency electrocatalyst
Source: Royal Society of Chemistry journal article supplement (doi:10.1039/d2qi01791a), 2022-01-01
Supplement: d2qi01791a1.pdf [file d2qi01791a1.pdf]

## Electronic Supplementary Information

### Experimental section

**Materials:** Sodium nitrate ( $\text{NaNO}_3$ , 99.0%), sodium nitrite ( $\text{NaNO}_2$ , 99.0%), ammonium chloride ( $\text{NH}_4\text{Cl}$ ), sodium hydroxide ( $\text{NaOH}$ ), sodium salicylate ( $\text{C}_7\text{H}_5\text{NaO}_3$ ), trisodium citrate dihydrate ( $\text{C}_6\text{H}_5\text{Na}_3\text{O}_7 \cdot 2\text{H}_2\text{O}$ ), p-dimethylaminobenzaldehyde ( $\text{C}_9\text{H}_{11}\text{NO}$ ), sodium nitroferricyanide dihydrate ( $\text{C}_5\text{FeN}_6\text{Na}_2\text{O} \cdot 2\text{H}_2\text{O}$ ), 0.8 wt% sulfamic acid solution ( $\text{H}_3\text{NO}_3\text{S}$ ) and sodium hypochlorite solution ( $\text{NaClO}$ ) were purchased from Aladdin Ltd. (Shanghai, China). Cobalt nitrate hexahydrate ( $\text{Co}(\text{NO}_3)_2 \cdot 6\text{H}_2\text{O}$ ) was purchased from Chengdu Kelong Chemical Reagent Co. Ltd. Sulfuric acid ( $\text{H}_2\text{SO}_4$ ), hydrogen peroxide ( $\text{H}_2\text{O}_2$ ), hydrochloric acid ( $\text{HCl}$ ), hydrazine monohydrate ( $\text{N}_2\text{H}_4 \cdot \text{H}_2\text{O}$ ) and ethyl alcohol ( $\text{C}_2\text{H}_5\text{OH}$ ) were bought from Beijing Chemical Corporation. (China). Ti plate (thickness is 0.2 mm) was purchased from Qingyuan Metal Materials Co., Ltd (Xingtai, China) and treated with 3 M  $\text{HCl}$  for 30 minutes before hydrothermal reaction. All chemicals used in this work were analytical grade and direct use without further purification.

**Preparation of Co-TiO<sub>2</sub>/TP:** Firstly, Ti plates were cut into small pieces ( $2.0 \times 4.0 \text{ cm}^2$ ) and sonicated in acetone, ethanol, and distilled water for 15 min, respectively. After then, they were put into 40 mL of 5 M  $\text{NaOH}$  aqueous solution in a 50 mL Teflon-lined autoclave. The autoclave was kept in an electric oven at  $180^\circ\text{C}$  for 24 h. After the autoclave was cooled down naturally to room temperature, the samples were moved out, washed with deionized water and ethanol several times and dried at  $60^\circ\text{C}$  for 30 min. Then the resulting  $\text{Na}_2\text{Ti}_2\text{O}_5/\text{TP}$  was immersed in 0.25 M  $\text{Co}(\text{NO}_3)_2$  for 1 h to exchange  $\text{Na}^+$  with  $\text{Co}^{2+}$ . The resulting  $\text{CoTi}_2\text{O}_5 \cdot \text{H}_2\text{O}/\text{TP}$  was rinsed with deionized water and ethanol several times and dried at  $60^\circ\text{C}$  for 30 min. Subsequently,  $\text{CoTi}_2\text{O}_5 \cdot \text{H}_2\text{O}/\text{TP}$  was annealed in a tube furnace at  $500^\circ\text{C}$  under an Ar atmosphere for 2 hours. After cooling to room temperature, Co-TiO<sub>2</sub>/TP was finally obtained.

**Preparation of TiO<sub>2</sub>/TP:** Firstly, Ti plates were cut into small pieces ( $2.0 \times 4.0 \text{ cm}^2$ )

and sonicated in acetone, ethanol, and distilled water for 15 min, respectively. After then, they were put into 40 mL of 5 M NaOH aqueous solution in a 50 mL Teflon-lined autoclave. The autoclave was kept in an electric oven at 180°C for 24 h. After the autoclave was cooled down naturally to room temperature, the samples were moved out, washed with deionized water and ethanol several times and dried at 60 °C for 30 min. Then the resulting Na<sub>2</sub>Ti<sub>2</sub>O<sub>5</sub>/TP was immersed in 1 M HCl for 1 h to exchange Na<sup>+</sup> with H<sup>+</sup>. The as-prepared H<sub>2</sub>Ti<sub>2</sub>O<sub>5</sub>·H<sub>2</sub>O/TP was rinsed with deionized water and ethanol several times and dried at 60 °C for 30 min. Subsequently, H<sub>2</sub>Ti<sub>2</sub>O<sub>5</sub>·H<sub>2</sub>O/TP was annealed in a tube furnace at 500°C under an Ar atmosphere for 2 hours. After cooling to room temperature, TiO<sub>2</sub>/TP was finally obtained.

**Characterizations:** XRD data were acquired by a LabX XRD-6100 X-ray diffractometer with a Cu K $\alpha$  radiation (40 kV, 30 mA) of wavelength 0.154 nm (SHIMADZU, Japan). SEM measurements were carried out on a GeminiSEM 300 scanning electron microscope (ZEISS, Germany) at an accelerating voltage of 5 kV. XPS measurements were performed on an ESCALABMK II X-ray photoelectron spectrometer using Mg as the exciting source. The absorbance data of the spectrophotometer was measured on a UV-Vis spectrophotometer. TEM image was obtained from a Zeiss Libra 200FE transmission electron microscope operated at 200 kV. Gas chromatography (GC-2014C, SHIMADZU) was utilized to quantitatively detect H<sub>2</sub> and N<sub>2</sub>. <sup>1</sup>H NMR spectra were collected on Varian VNMRS 600 MHz (the USA).

**Electrochemical measurements:** All electrochemical measurements were carried out on the CHI660E electrochemical workstation (Shanghai, Chenhua) using a standard three-electrode setup. The electrolyte solution was Ar-saturated of 0.1 M NaOH with 0.1 M NO<sub>3</sub><sup>-</sup>, using Co-TiO<sub>2</sub>/TP, TiO<sub>2</sub>/TP, or TP as the working electrode, a graphite rod as the counter electrode, and a Hg/HgO as the reference electrode. We use an H-type electrolytic cell separated by a Nafion 117 membrane which was protonated by boiling in ultrapure water, H<sub>2</sub>O<sub>2</sub> (5%) aqueous solution and 0.5 M H<sub>2</sub>SO<sub>4</sub> at 80 °C for another 2 h, respectively. All the potentials reported in our work were converted to a reversible hydrogen electrode via calibration with the following equation: E (RHE) =

$E \text{ (Hg/HgO)} + (0.098 + 0.0591 \times \text{pH}) \text{ V}$  and the presented current density was normalized to the geometric surface area.

**Determination of  $\text{NH}_3$ :** The concentration of produced  $\text{NH}_3$  was determined by spectrophotometry measurement with the indophenol blue method (the obtained electrolyte was diluted 40 times).<sup>1</sup> In detail, 2 mL of the diluted catholyte was obtained from the cathodic chamber and mixed with 2 mL of a 1 M NaOH solution that contained salicylic acid and sodium citrate. Then, 1 mL of 0.05 M NaClO and 0.2 mL of 1 wt%  $\text{C}_5\text{FeN}_6\text{Na}_2\text{O}$  were dropped into the collected electrolyte solution. After standing at room temperature for 2 h, the ultraviolet-visible absorption spectrum was measured. The concentration-absorbance curve was calibrated using the standard  $\text{NH}_4\text{Cl}$  solution with  $\text{NH}_3$  concentrations of 0, 0.25, 0.5, 1.5, 2.0, 3.0 and 4.0  $\mu\text{g mL}^{-1}$  in 0.1 M NaOH. The absorbance at 655 nm was measured to quantify the  $\text{NH}_3$  concentration using standard  $\text{NH}_4\text{Cl}$  solutions ( $y = 0.42074x + 0.02455$ ,  $R^2 = 0.9997$ ).

**Determination of  $\text{NO}_2^-$ :** The  $\text{NO}_2^-$  concentration was analyzed using the Griess test.<sup>2</sup> The Griess reagent was prepared by dissolving 0.1 g N-(1-naphthyl) ethylenediamine dihydrochloride, 1.0 g sulfonamide and 2.94 mL  $\text{H}_3\text{PO}_4$  in 50 mL deionized water. In a typical colourimetric assay, the 1.0 mL Griess reagent was mixed with the 1.0 mL nitrite-containing solution and 2.0 mL  $\text{H}_2\text{O}$  and allowed to react at room temperature for 10 min, in which sulfonamide reacts with  $\text{NO}_2^-$  to form a diazonium salt and then further reacts with the amine to form an azo dye (magenta). The absorbance at 540 nm was measured to quantify the  $\text{NO}_2^-$  concentration with a standard curve of  $\text{NO}_2^-$  ( $y = 0.20595x + 0.06651$ ,  $R^2 = 0.9999$ ).

**Determination of  $\text{N}_2\text{H}_4$ :** In this work, we used the method of Watt and Chrisp<sup>3</sup> to determine the concentration of produced  $\text{N}_2\text{H}_4$ . The chromogenic reagent was a mixed solution of 5.99 g  $\text{C}_9\text{H}_{11}\text{NO}$ , 30 mL HCl and 300 mL  $\text{C}_2\text{H}_5\text{OH}$ . In detail, 1 mL of electrolyte was added into 1 mL prepared colour reagent and stirred for 15 min in the dark. The absorbance at 455 nm was measured to quantify the  $\text{N}_2\text{H}_4$  concentration with a standard curve of hydrazine ( $y = 0.6878x + 0.1066$ ,  $R^2 = 0.9997$ ).

**Detection of  $\text{Co}^{2+}$ :** First, the Co-TiO<sub>2</sub> nanoribbons array was scraped from the TP and weighed 40 mg. Next, the Co-TiO<sub>2</sub> powder was dissolved into 2 mL of mixed acid

prepared from hydrochloric acid and nitric acid ( $V_{\text{HCl}}: V_{\text{HNO}_3} = 3:1$ ). Finally, the prepared solution was diluted 20,000-fold and the concentration of Co ions was measured on an inductively coupled plasma-mass spectrometry (ICP-MS) instrument.

#### **Calculations of FE and $\text{NH}_3$ yield:**

The amount of  $\text{NH}_3$  ( $m_{\text{NH}_3}$ ) was calculated by the following equation:

$$m_{\text{NH}_3} = [\text{NH}_3] \times V$$

FE of  $\text{NH}_3$  formation was calculated by the following equation:

$$\text{FE} = (8 \times F \times [\text{NH}_3] \times V) / (M_{\text{NH}_3} \times Q) \times 100\%$$

The  $\text{NH}_3$  yield rate is calculated using the following equation:

$$\text{NH}_3 \text{ yield} = ([\text{NH}_3] \times V) / (M_{\text{NH}_3} \times t \times A)$$

Where  $F$  is the Faradaic constant ( $96485 \text{ C mol}^{-1}$ ),  $[\text{NH}_3]$  is the  $\text{NH}_3$  concentration,  $V$  is the volume of electrolyte in the anode compartment (70 mL),  $M_{\text{NH}_3}$  is the molar mass of the  $\text{NH}_3$  molecule,  $Q$  is the total quantity of applied electricity;  $t$  is the electrolysis time (1 h) and  $A$  is the geometric area of the working electrode ( $1 \times 1 \text{ cm}^2$ ).

#### **Calculation of the partial current density:**

$$j_{\text{partial}} = \text{FE} \times I$$

Among them,  $j_{\text{partial}}$  represents the partial current density at each given potential; FE is the corresponding Faradaic efficiency of each product at the given potential;  $I$  is the corresponding current at each given potential.

#### **Calculation of the energy consumed in the formation of $\text{V}_{\text{Os}}$ ( $E_f$ ):**

The energy consumed to form  $\text{V}_{\text{Os}}$  in Co-TiO<sub>2</sub> can be calculated by the following equation:

$$E_f = E_{(\text{VOs-Co-TiO}_2)} + E_{(\text{O}_2)}/2 - E_{(\text{Co-TiO}_2)}.$$

Among them,  $E_{(\text{VOs-Co-TiO}_2)}$  denotes the total energy of the Co-TiO<sub>2</sub> system after the formation of  $\text{V}_{\text{Os}}$ ;  $E_{(\text{O}_2)}$  is the energy of the  $\text{O}_2$  molecule;  $E_{(\text{Co-TiO}_2)}$  refers to the total energy of the TiO<sub>2</sub> system after Co doping into TiO<sub>2</sub>.

The energy consumed to form  $\text{V}_{\text{Os}}$  in TiO<sub>2</sub> can be calculated by the following equation:

$$E_f = E_{(\text{VOs-TiO}_2)} + E_{(\text{O}_2)}/2 - E_{(\text{TiO}_2)}.$$

Among them,  $E_{(\text{VOs-TiO}_2)}$  presents the total energy of  $\text{TiO}_2$  after the formation of  $\text{V}_{\text{Os}}$ ;  $E_{(\text{O}_2)}$  is the energy of the  $\text{O}_2$  molecule;  $E_{(\text{TiO}_2)}$  represents the total energy of the  $\text{TiO}_2$  system without  $\text{V}_{\text{Os}}$ .

**DFT calculations details:** First-principles calculations with spin-polarized were performed using density functional theory (DFT) implemented in the VASP package,<sup>4</sup> and the projector augmented wave (PAW) approach was used to describe the interaction between ionic core and valence electrons with a cutoff of 500 eV.<sup>5</sup> Perdew-Burke-Ernzerhof functional (PBE) with semi-empirical corrections of DFT-D3 were employed to depict the exchange-correlation functional effect by general gradient approximation (GGA).<sup>6</sup> Co- $\text{TiO}_2$  (101) and  $\text{TiO}_2$  (101) surfaces with two terminations were modelled. The bottom two layers were fixed, and the upper two layers were permitted to relax. The thickness of the vacuum region is 15 Å to avert spurious interaction. The Brillouin zone was built by  $3 \times 3 \times 1$  special k-points based on the Monkhorst Pack scheme for structural configuration optimizations.<sup>7</sup> The total energy is less than  $10^{-5}$  eV and the force convergence threshold is 0.02 eV/Å, respectively. The DFT calculation results were analyzed by VASPKIT software.<sup>8</sup>

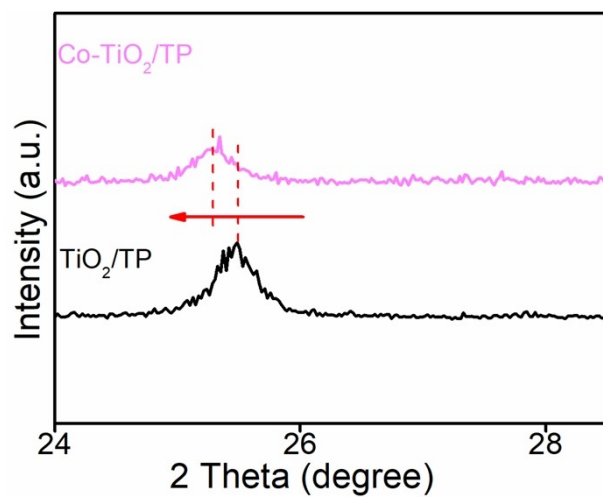

**Fig. S1.** XRD patterns for Co-TiO<sub>2</sub>/TP and TiO<sub>2</sub>/TP.

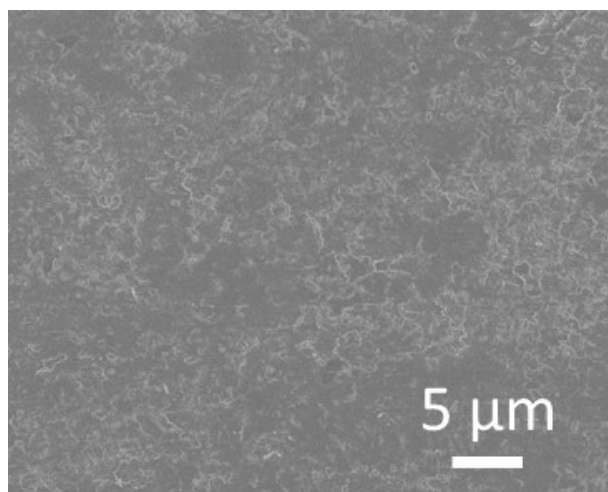

**Fig. S2.** SEM image of bare TP

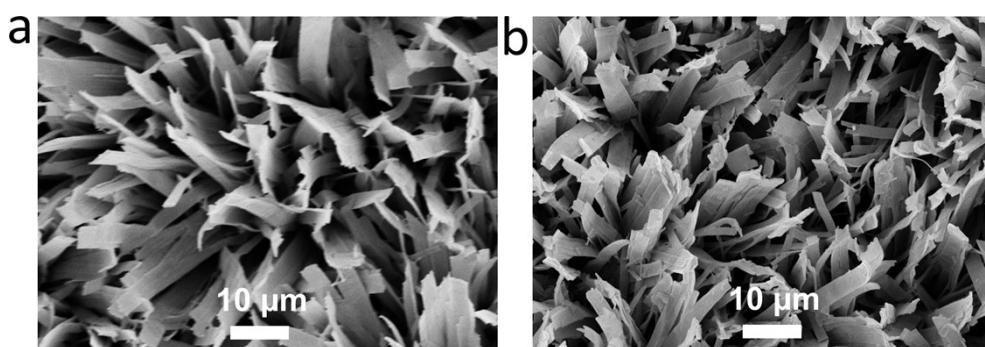

**Fig. S3.** SEM images of (a)  $\text{Na}_2\text{Ti}_2\text{O}_5/\text{TP}$  and (b)  $\text{CoTi}_2\text{O}_5/\text{TP}$ .

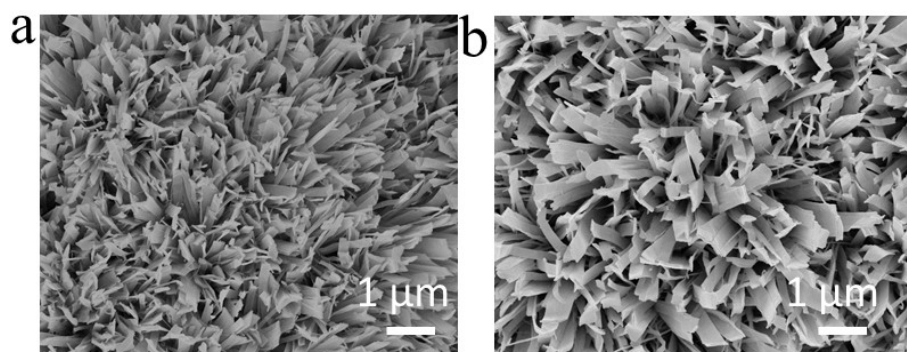

**Fig. S4.** SEM images of (a)  $\text{TiO}_2/\text{TP}$ , and (b)  $\text{Co-TiO}_2/\text{TP}$ .

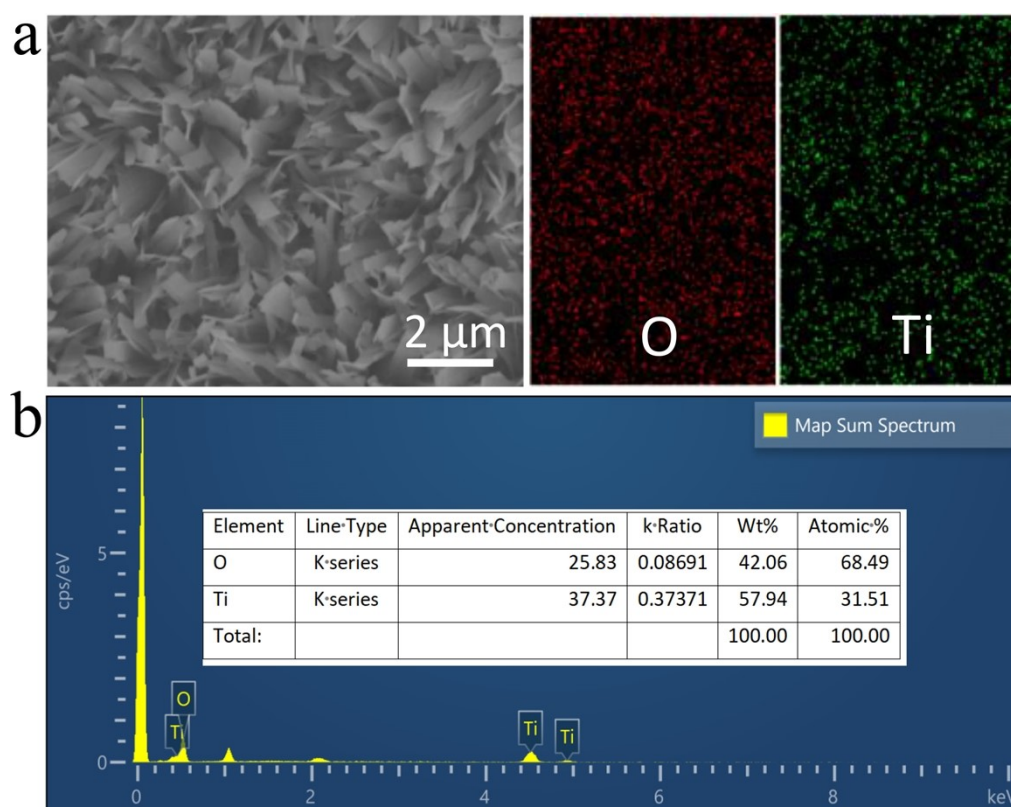

**Fig. S5.** (a) The SEM and corresponding EDX mapping images of Ti and O for  $\text{TiO}_2/\text{TP}$ . (b) EDX spectrum of  $\text{TiO}_2/\text{TP}$ .

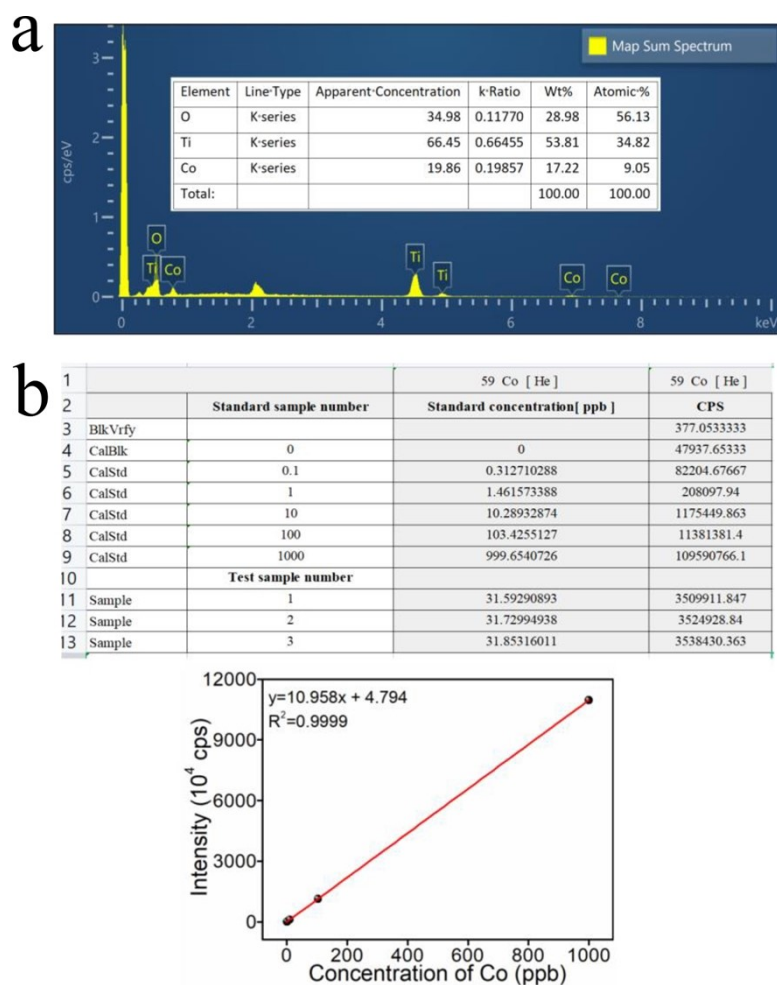

**Fig. S6.** (a) EDX spectrum for Co-TiO<sub>2</sub>/TP. (b) The ICP-MS data of Co ions and calibration curve.

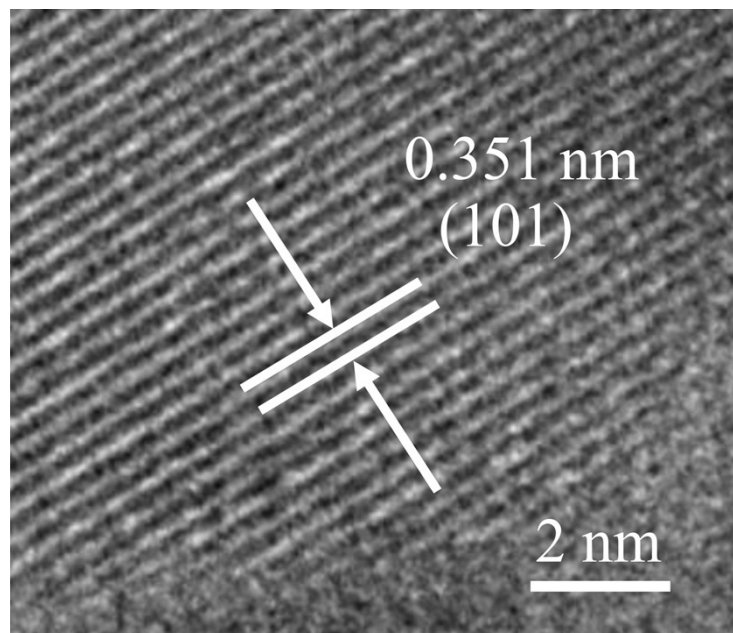

**Fig. S7.** HRTEM image of undoped TiO<sub>2</sub>

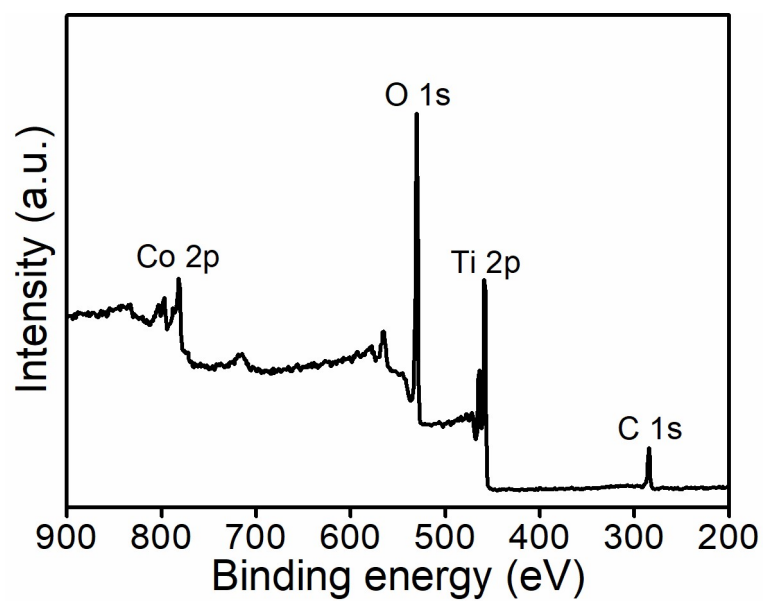

**Fig. S8.** XPS survey spectrum of Co-TiO<sub>2</sub>.

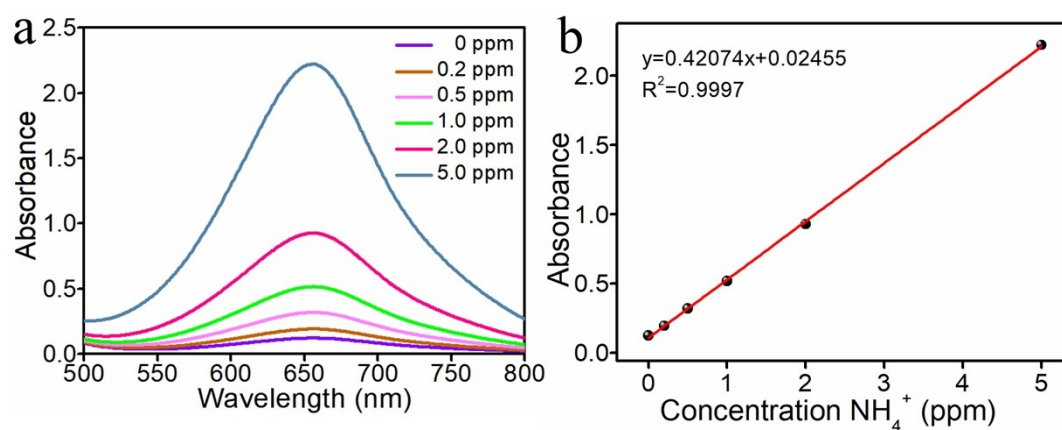

**Fig. S9.** (a) UV-Vis absorption spectra of indophenol assays kept with different concentrations of  $\text{NH}_4^+$  after incubated for 2 h at room temperature. (b) Calibration curve used for estimation of  $\text{NH}_4^+$  concentration.

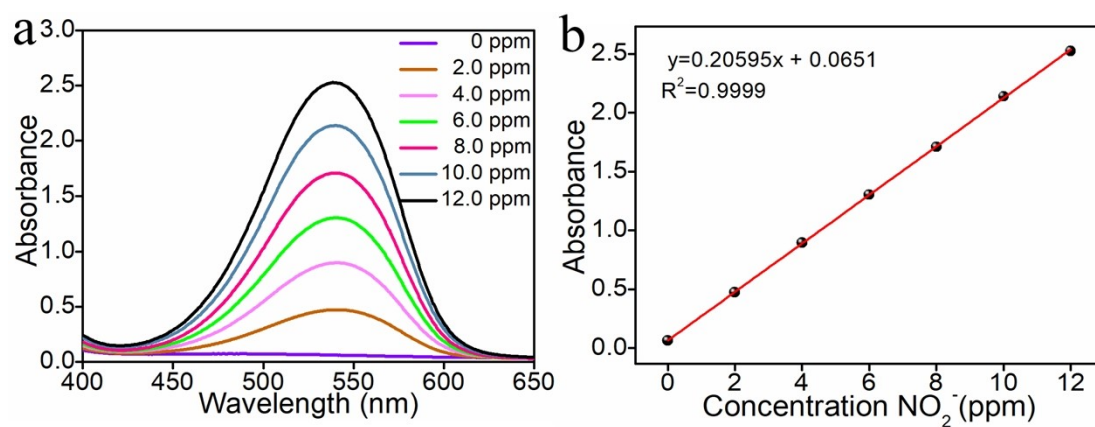

**Fig. S10.** UV-Vis absorption spectra of various  $\text{NO}_2^-$  concentrations after incubated for 10 min at room temperature. (b) Calibration curve used for quantification of  $\text{NO}_2^-$  concentration.

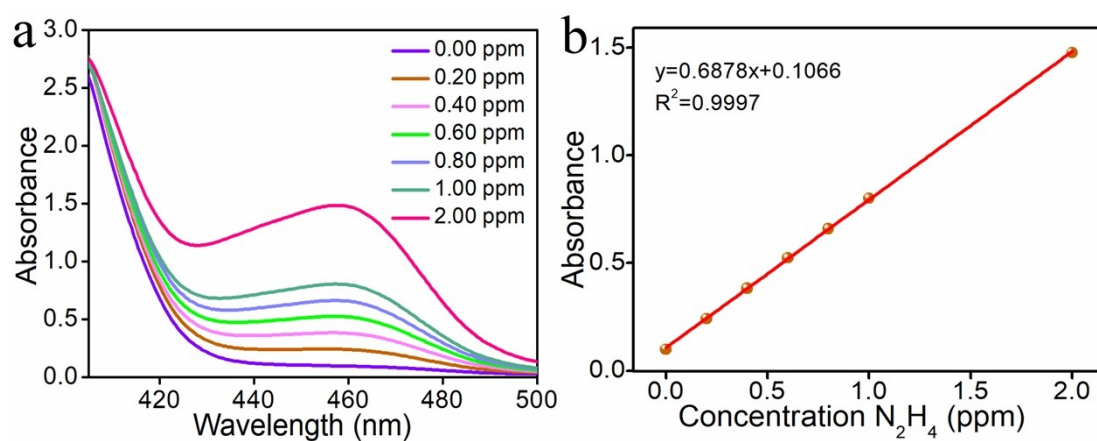

**Fig. S11.** (a) UV-Vis absorption spectra of various  $\text{N}_2\text{H}_4$  concentrations after incubated for 15 min at room temperature. (b) Calibration curve used for calculation of  $\text{N}_2\text{H}_4$  concentration.

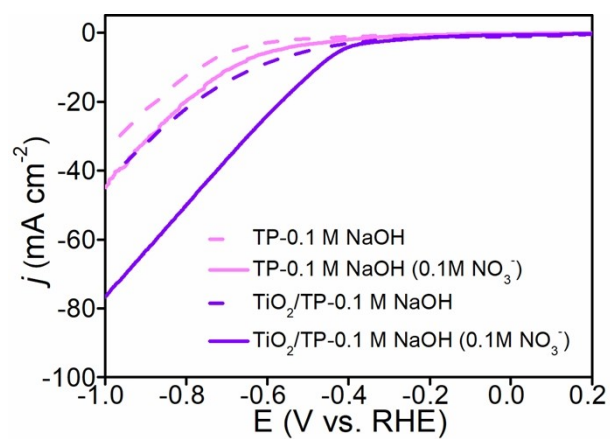

**Fig. S12.** LSV curves of TiO<sub>2</sub>/TP and TP in 0.1 M NaOH with and without 0.1 M NO<sub>3</sub><sup>-</sup>.

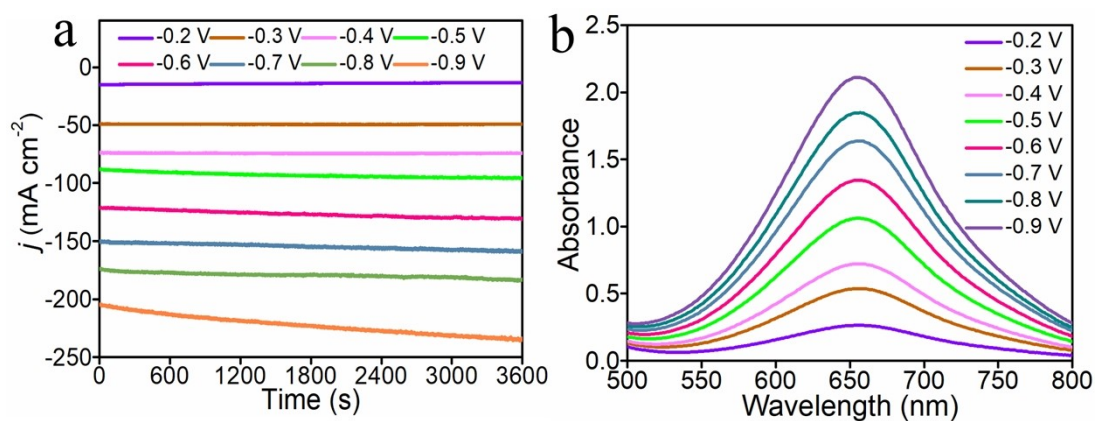

**Fig. S13.** (a) Chronoamperometry curves and (b) corresponding UV-Vis spectra of Co-TiO<sub>2</sub>/TP at different given potentials.

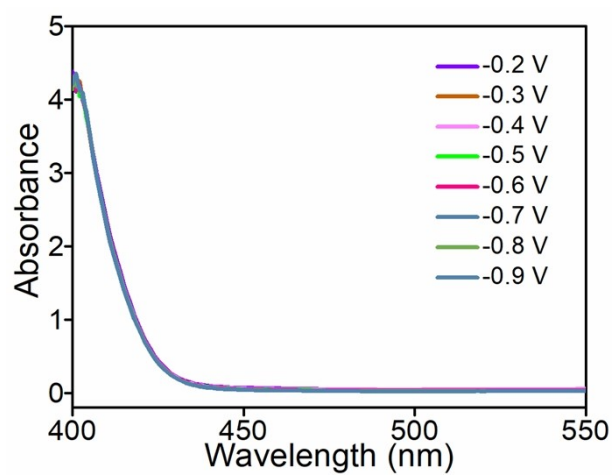

**Fig. S14.** UV-Vis absorption spectra of the electrolytes estimated by the method of Watt and Chrisp for the calculation of  $\text{N}_2\text{H}_4$  concentration.

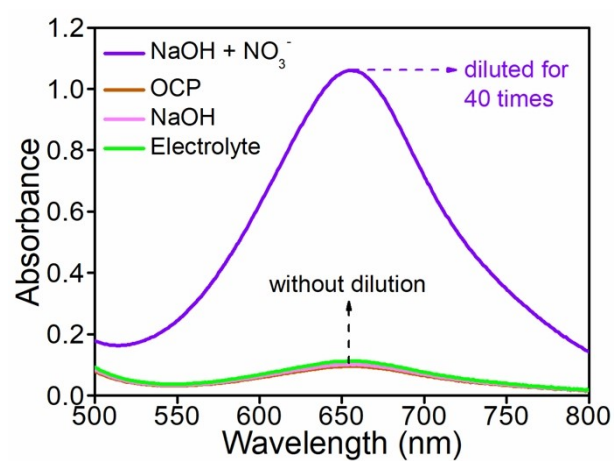

**Fig. S15.** UV-Vis absorption spectra of  $\text{NH}_3$  concentrations at different conditions.

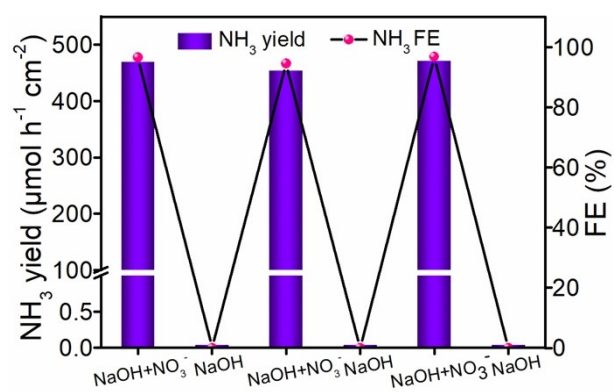

**Fig. S16.** NH<sub>3</sub> yields and FEs of Co-TiO<sub>2</sub>/TP during the alternating cycle tests between NO<sub>3</sub><sup>-</sup>-containing and NO<sub>3</sub><sup>-</sup>-free 0.1 M NaOH solution.

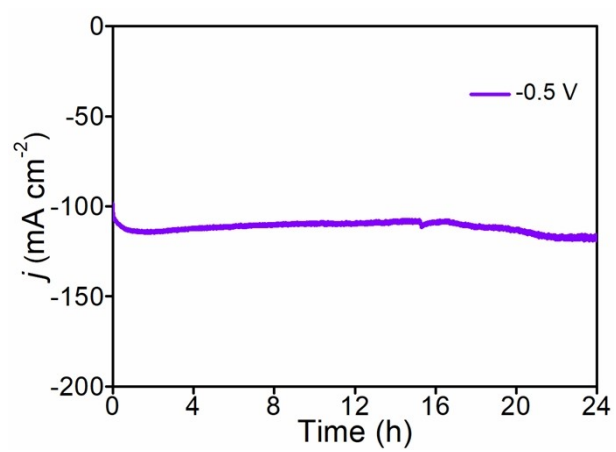

**Fig. S17.** Long-term stability test at  $-0.5\text{ V}$ .

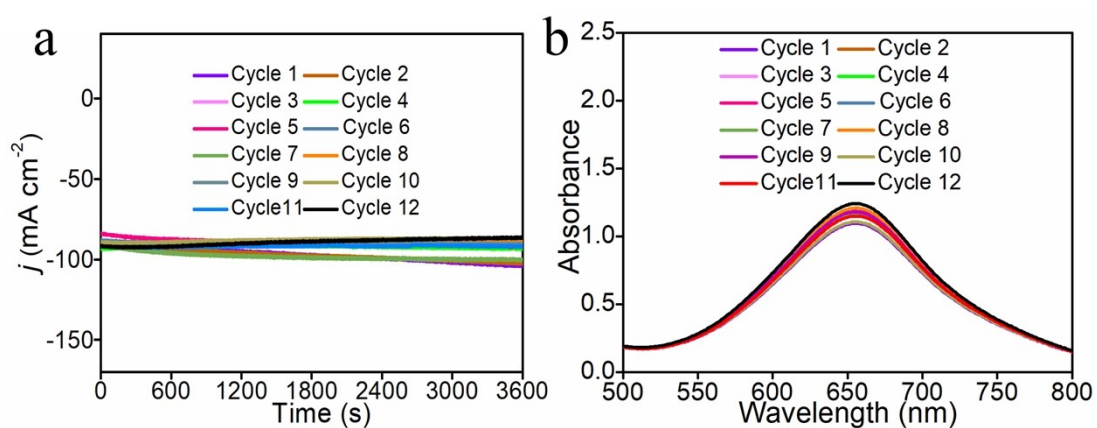

**Fig. S18.** (a) Chronoamperometry curves and (b) corresponding UV-Vis absorption spectra of Co-TiO<sub>2</sub>/TP for electrogenerated NH<sub>3</sub> during cycling tests at -0.5 V.

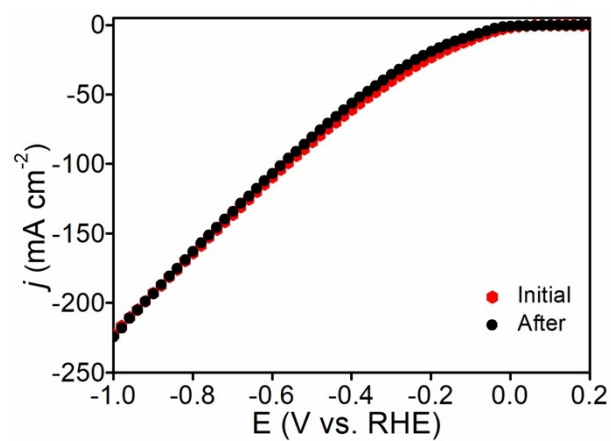

**Fig. S19.** LSV curves of Co-TiO<sub>2</sub>/TP before and after 24-h electrolysis.

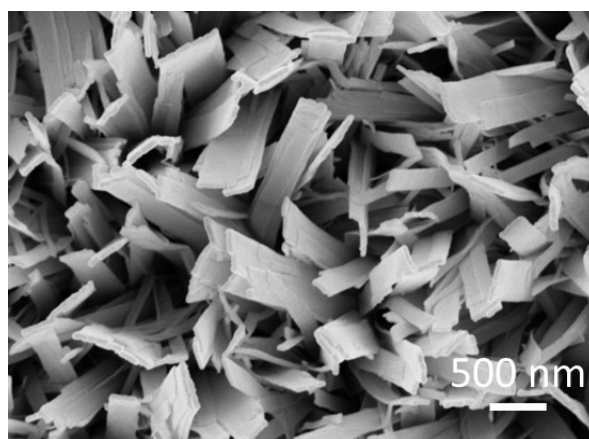

**Fig. S20.** SEM image of Co-TiO<sub>2</sub>/TP after 24-h electrolysis.

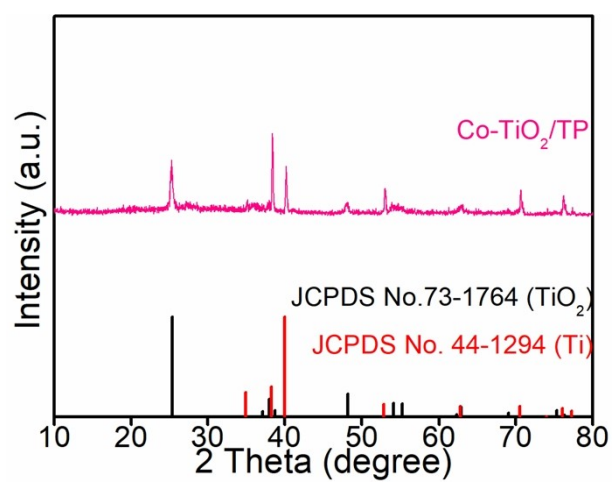

**Fig. S21.** XRD pattern of Co-TiO<sub>2</sub>/TP after 24-h electrolysis.

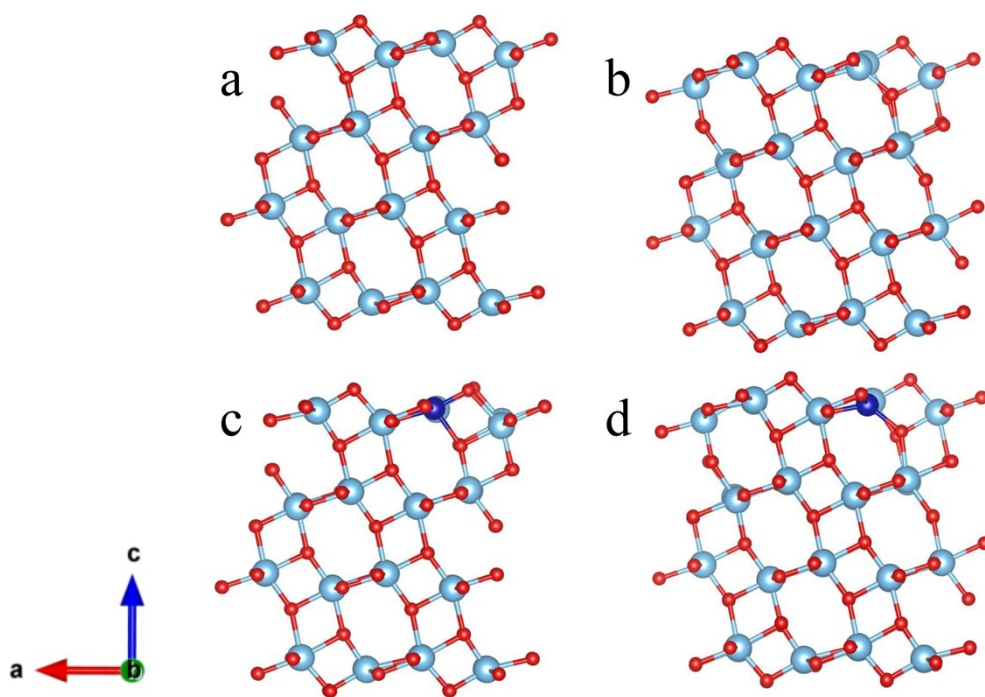

**Fig. S22.** Crystal structures of (a)  $\text{TiO}_2$  without oxygen vacancies, (b)  $\text{TiO}_2$  with oxygen vacancies, (c)  $\text{Co-TiO}_2$  without oxygen vacancies, and (d)  $\text{Co-TiO}_2$  with oxygen vacancies. Dark blue, red, and light blue spheres denote the Co, O, and Ti atoms, respectively.

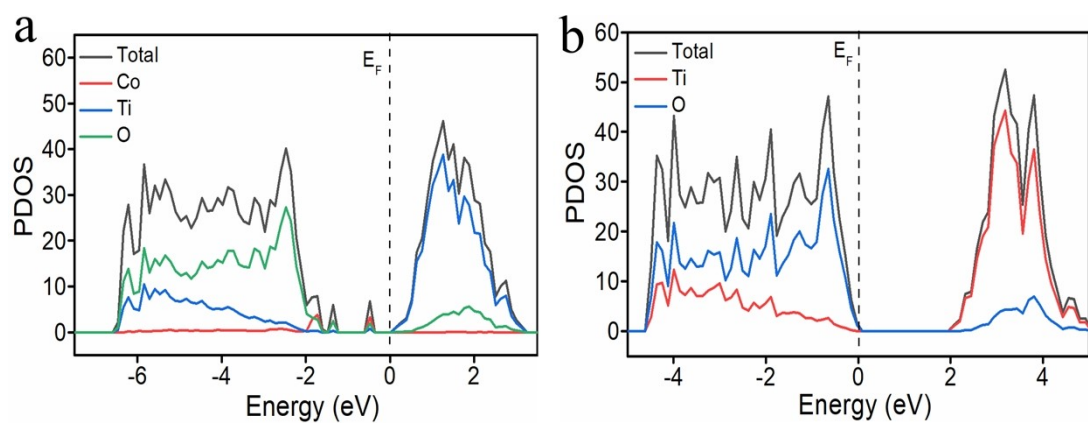

**Fig. S23.** Calculated PDOS of (a) Co-TiO<sub>2</sub> and (b) TiO<sub>2</sub> configuration.

**Table S1.** Comparison of catalytic performance of Co-TiO<sub>2</sub>/TP with other reported NO<sub>3</sub>RR electrocatalysts.

| Catalyst                              | Electrolyte                                                                     | NH <sub>3</sub> yield                                     | FE      | Ref.      |
|---------------------------------------|---------------------------------------------------------------------------------|-----------------------------------------------------------|---------|-----------|
| Co-TiO <sub>2</sub> /TP               | 0.1 M NaOH<br>(0.1 M NO <sub>3</sub> <sup>-</sup> )                             | 1127 μmol h <sup>-1</sup> cm <sup>-2</sup>                | 98.2%   | This work |
| TiO <sub>2-x</sub>                    | 0.5 M Na <sub>2</sub> SO <sub>4</sub><br>(50 ppm NO <sub>3</sub> <sup>-</sup> ) | 45 μmol h <sup>-1</sup> mg <sub>cat.</sub> <sup>-1</sup>  | 85%     | 9         |
| Pd facets                             | 0.1 M NaOH<br>(20 mM NO <sub>3</sub> <sup>-</sup> )                             | 18 μmol h <sup>-1</sup> cm <sup>-2</sup>                  | 35%     | 10        |
| Ni NP                                 | 1 M NaOH<br>(20 mM NO <sub>3</sub> <sup>-</sup> )                               | /                                                         | 46.3%   | 11        |
| Pd/TiO <sub>2</sub>                   | 0.5 M NaOH<br>(0.25 M NO <sub>3</sub> <sup>-</sup> )                            | 66 μmol h <sup>-1</sup> cm <sup>-2</sup>                  | 92%     | 12        |
| Cu                                    | 1 M NaOH<br>(0.1 M NO <sub>3</sub> <sup>-</sup> )                               | /                                                         | 79%     | 13        |
| In-S-G                                | 1 M KOH<br>(0.1 M NO <sub>3</sub> <sup>-</sup> )                                | 220 μmol h <sup>-1</sup> mg <sub>cat.</sub> <sup>-1</sup> | 75%     | 14        |
| Fe SAC                                | 1 M KOH<br>(0.1 M NO <sub>3</sub> <sup>-</sup> )                                | /                                                         | 86%     | 15        |
| BC <sub>2</sub> N/Pd                  | 0.1 M KOH<br>(0.25 M NO <sub>3</sub> <sup>-</sup> )                             | 100 μmol h <sup>-1</sup> cm <sup>-2</sup>                 | 97.42%  | 16        |
| Fe-PPy SACs                           | 0.1 M KOH<br>(0.1 M NO <sub>3</sub> <sup>-</sup> )                              | 160 μmol h <sup>-1</sup> cm <sup>-2</sup>                 | ~100%   | 17        |
| BCN@Ni                                | 0.1 M KOH<br>(0.1 M NO <sub>3</sub> <sup>-</sup> )                              | 140 μmol h <sup>-1</sup> cm <sup>-2</sup>                 | 91.15%  | 18        |
| Ni <sub>3</sub> B@NiB <sub>2.74</sub> | 0.1 M KOH<br>(0.1 M NO <sub>3</sub> <sup>-</sup> )                              | 200 μmol h <sup>-1</sup> cm <sup>-2</sup>                 | ~100%   | 19        |
| BCN-Cu                                | 0.1 M KOH<br>(100 mM NO <sub>3</sub> <sup>-</sup> )                             | 110 μmol h <sup>-1</sup> cm <sup>-2</sup>                 | 98.23%  | 20        |
| ZnCo <sub>2</sub> O <sub>4</sub>      | 0.1 M KOH<br>(0.1 M NO <sub>3</sub> <sup>-</sup> )                              | 120 μmol h <sup>-1</sup> mg <sub>cat.</sub> <sup>-1</sup> | 95.4%   | 21        |
| Co-NCNT                               | 0.1 M NaOH<br>(0.1 M NO <sub>3</sub> <sup>-</sup> )                             | 350 μmol h <sup>-1</sup> mg <sub>cat.</sub> <sup>-1</sup> | 92%     | 22        |
| Cu <sub>50</sub> Ni <sub>50</sub>     | 0.1 M NaOH<br>(10 mM NO <sub>3</sub> <sup>-</sup> )                             | /                                                         | 84 ± 2% | 23        |

---

## References

- 1 D. Zhu, L. Zhang, R. E. Ruther and R. J. Hamers, Photo-illuminated diamond as a solid-state source of solvated electrons in water for nitrogen reduction, *Nat. Mater.*, 2013, **12**, 836–841.
- 2 G. W. Watt and J. D. Chrisp, Spectrophotometric method for determination of hydrazine, *Anal. Chem.*, 1952, **24**, 2006–2008.
- 3 L. C. Green, D. A. Wagner, J. Glogowski, P. L. Skipper, J. S. Wishnok and S. R. Tannenbaum, Analysis of nitrate, nitrite, and [ $^{15}\text{N}$ ] nitrate in biological fluids, *Anal. Biochem.*, 1982, **126**, 131–138.
- 4 G. Kresse and J. Hafner, Ab initio molecular-dynamics simulation of the liquid-metal–amorphous-semiconductor transition in germanium, *Phys. Rev. B*, 1994, **49**, 14251–14269.
- 5 G. Kresse and D. Joubert, From ultrasoft pseudopotentials to the projector augmented-wave method, *Phys. Rev. B*, 1999, **59**, 1758–1775.
- 6 J. P. Perdew, K. Burke and M. Ernzerhof, Generalized Gradient Approximation Made Simple, *Phys. Rev. Lett.*, 1996, **77**, 3865–3868.
- 7 H. J. Monkhorst and J. D. Pack, Special points for Brillouin-zone integrations, *Phys. Rev. B*, 1976, **13**, 5188–5192.
- 8 V. Wang, N. Xu, J. Liu, G. Tang and W. Geng, VASPKIT: A user-friendly interface facilitating high-throughput computing and analysis using VASP code, *Comput. Phys. Commun.*, 2021, **267**, 108033.
- 9 R. Jia, Y. Wang, C. Wang, Y. Ling, Y. Yu and B. Zhang, Boosting selective nitrate electroreduction to ammonium by constructing oxygen vacancies in  $\text{TiO}_2$ , *ACS Catal.*, 2020, **10**, 3533–3540.
- 10 J. Lim, C. Liu, J. Park, Y. Liu, T. P. Senftle, S. W. Lee and M. C. Hatzell, Structure sensitivity of Pd facets for enhanced electrochemical nitrate reduction to ammonia, *ACS Catal.*, 2021, **11**, 7568–7577.

- 
- 11 L. Mattarozzi, S. Cattarin, N. Comisso, P. Guerriero, M. Musiani, L. Vázquez-Gómez and E. Verlato, Electrochemical reduction of nitrate and nitrite in alkaline media at CuNi alloy electrodes, *Electrochim. Acta*, 2013, **89**, 488–496.
- 12 Y. Guo, R. Zhang, S. Zhang, Y. Zhao, Q. Yang, Z. Huang, B. Dong and C. Zhi, Pd doping-weakened intermediate adsorption to promote electrocatalytic nitrate reduction on TiO<sub>2</sub> nanoarrays for ammonia production and energy supply with zinc–nitrate batteries, *Energy Environ. Sci.*, 2021, **14**, 3938–3944.
- 13 D. Reyter, G. Chamoulaud, D. Bélanger and L. Roué, Electrocatalytic reduction of nitrate on copper electrodes prepared by high-energy ball milling, *J. Electroanal. Chem.*, 2006, **596**, 13–24.
- 14 F. Lei, W. Xu, J. Yu, K. Li, J. Xie, P. Hao, G. Cui and B. Tang, Electrochemical synthesis of ammonia by nitrate reduction on indium incorporated in sulfur doped graphene, *Chem. Eng. J.*, 2021, **426**, 131317.
- 15 Z. Wu, M. Karamad, X. Yong, Q. Huang, D. A. Cullen, P. Zhu, C. Xia, Q. Xiao, M. Shakouri, F. Chen, J. Y. Kim, Y. Xia, K. Heck, Y. Hu, M. S. Wong, Q. Li, I. Gates, S. Siahrostami and H. Wang, Electrochemical ammonia synthesis via nitrate reduction on Fe single atom catalyst, *Nat. Commun.*, 2021, **12**, 2870.
- 16 X. Li, X. Zhao, Y. Zhou, J. Hu, H. Zhang, X. Hu and G. Hu, Pd nanocrystals embedded in BC<sub>2</sub>N for efficient electrochemical conversion of nitrate to ammonia, *Appl. Surf. Sci.*, 2022, **584**, 152556.
- 17 P. Li, Z. Jin, Z. Fang and G. Yu, A single-site iron catalyst with preoccupied active centers that achieves selective ammonia electrosynthesis from nitrate, *Energy Environ. Sci.*, 2021, **14**, 3522–3531.
- 18 X. Zhao, Z. Zhu, Y. He, H. Zhang, X. Zhou, W. Hu, M. Li, S. Zhang, Y. Dong, X. Hu, A. V. Kuklin, G. V. Baryshnikov, H. Ågren, T. Wågberg and G. Hu, Simultaneous anchoring of Ni nanoparticles and single-atom Ni on BCN matrix promotes efficient conversion of nitrate in water into high-value-added ammonia, *Chem. Eng. J.*, 2022, **433**, 133190.

- 
- 19 L. Li, C. Tang, X. Cui, Y. Zheng, X. Wang, H. Xu, S. Zhang, T. Shao, K. Davey and S. Qiao, Efficient nitrogen fixation to ammonia through integration of plasma oxidation with electrocatalytic reduction, *Angew. Chem., Int. Ed.*, 2021, **60**, 14131–14137.
- 20 X. Zhao, X. Jia, Y. He, H. Zhang, X. Zhou, H. Zhang, S. Zhang, Y. Dong, X. Hu, A. V. Kuklin, G. V. Baryshnikov, H. Ågren and G. Hu, Two-dimensional BCN matrix inlaid with single-atom-Cu driven electrochemical nitrate reduction reaction to achieve sustainable industrial-grade production of ammonia, *Appl. Mater. Today*, 2021, **25**, 101206.
- 21 P. Huang, T. Fan, X. Ma, J. Zhang, Z. Chen and X. Yi, 3D Flower-Like zinc cobaltite for electrocatalytic reduction of nitrate to ammonia under ambient conditions, *ChemSusChem*, 2022, DOI: 10.1002/cssc.202102049.
- 22 J. Chen, Q. Zhou, L. Yue, D. Zhao, L. Zhang, Y. Luo, Q. Liu, N. Li, A. A. Alshehri, M. S. Hamdy, F. Gong and X. Sun, Co–NCNT nanohybrid as a highly active catalyst for the electroreduction of nitrate to ammonia, *Chem. Commun.*, 2022, **58**, 3787–3790.
- 23 Y. Wang, A. Xu, Z. Wang, L. Huang, J. Li, F. Li, J. Wicks, M. Luo, D. H. Nam, C. Tan, Y. Ding, J. Wu, Y. Lum, C. T. Dinh, D. Sinton, G. Zheng and E. H. Sargent, Enhanced nitrate-to-ammonia activity on copper–nickel alloys via tuning of intermediate adsorption, *J. Am. Chem. Soc.*, 2020, **142**, 5702–5708.
